# Supplementary material for: A Multichannel Fluorescent Array Sensor for Discrimination of Different Types of Drug-Induced Kidney Injury
Source: MDPI journal article supplement (doi:10.3390/s23136114), 2023-07-03
Supplement: s1 [file s1]

# **A Multichannel Fluorescent Array Sensor for Discrimination of Different Types of Drug-Induced Kidney Injury**

**Kunhui Sun <sup>1,2,†</sup>, Bing Wang <sup>2,†</sup>, Jiaoli Lin <sup>1</sup>, Lei Han <sup>1</sup>, Meifang Li <sup>2</sup>, Ping Wang <sup>2</sup>, Xie-an Yu <sup>2,\*</sup>  
and Jiangwei Tian <sup>1,\*</sup>**

<sup>1</sup> State Key Laboratory of Natural Medicines, Jiangsu Key Laboratory of TCM Evaluation and Translational Research, School of Traditional Chinese Pharmacy, China Pharmaceutical University, Nanjing 211198, China

<sup>2</sup> NMPA Key Laboratory for Bioequivalence Research of Generic Drug Evaluation, Shenzhen Institute for Drug Control, Shenzhen 518057, China

† These authors contributed equally to this work.

\* Corresponding authors: yuxieanalj@126.com (Y.X.); jwtian@cpu.edu.cn (J.T.)

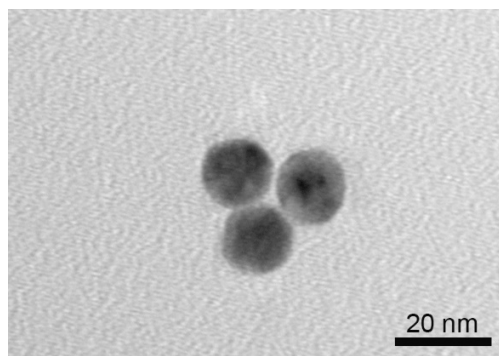

**Figure S1.** TEM image of AuNPs.

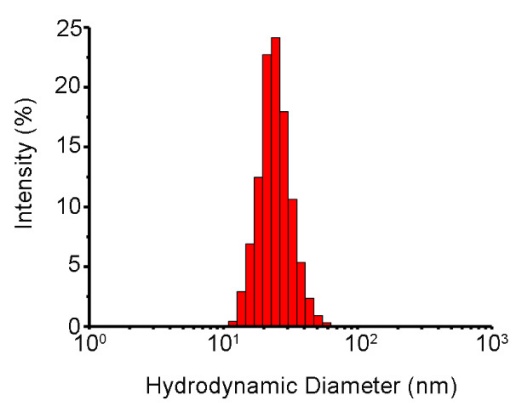

**Figure S2.** Size characterization of AuNPs.

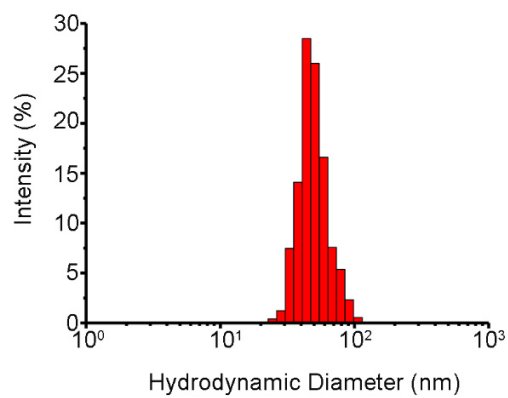

**Figure S3.** Size characterization of AuNPs-PEI/FLPs nanosensor.

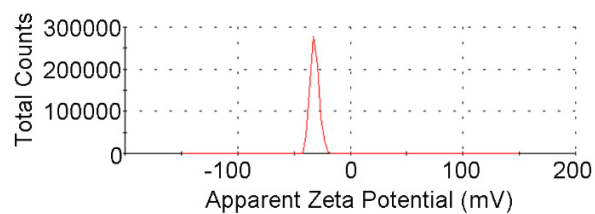

**Figure S4.** Zeta potential characterization of AuNPs.

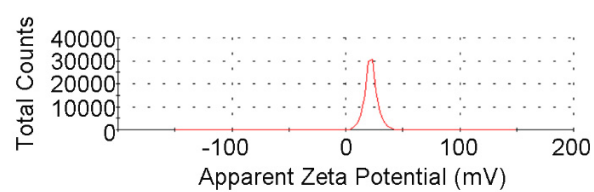

**Figure S5.** Zeta potential characterization of AuNPs-PEI.

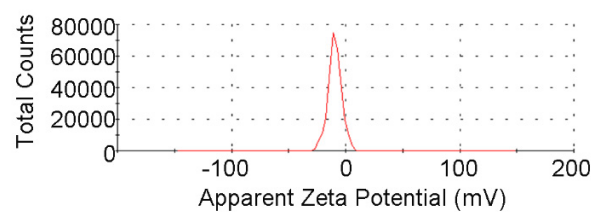

**Figure S6.** Zeta potential characterization of AuNPs-PEI/FLPs nanosensor.

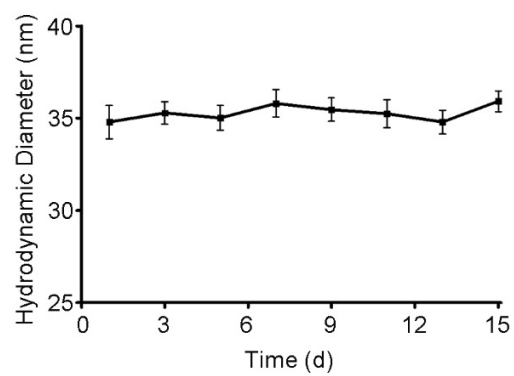

**Figure S7.** Hydrodynamic diameter of AuNPs-PEI during 2 weeks.

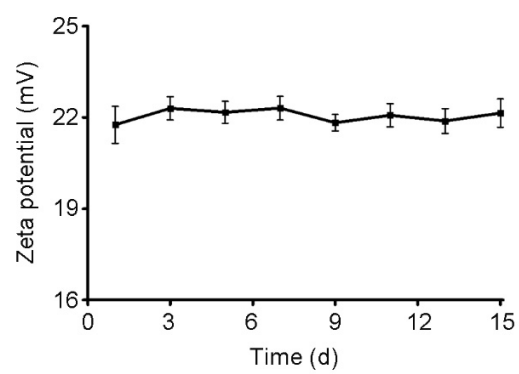

**Figure S8.** Zeta potential of AuNPs-PEI during 2 weeks.

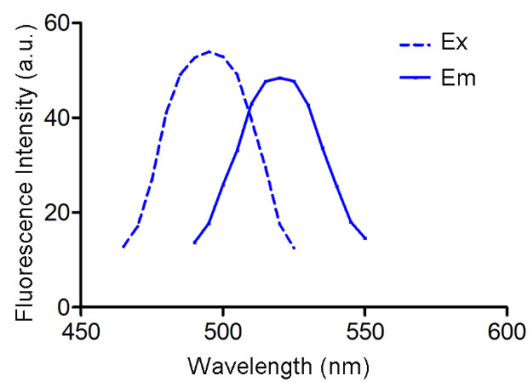

**Figure S9.** Excitation and emission fluorescence spectra of BSA-FITC.

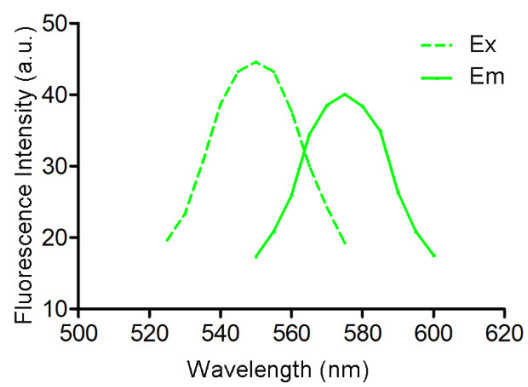

**Figure S10.** Excitation and emission fluorescence spectra of PNA-RhB.

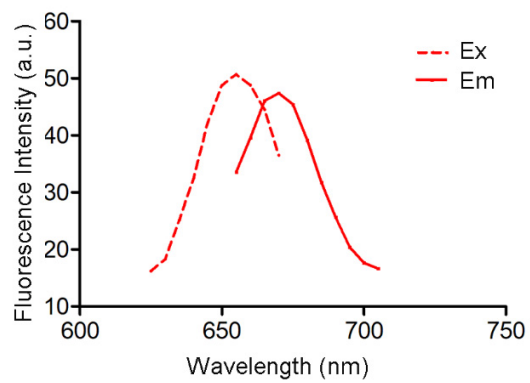

**Figure S11.** Excitation and emission fluorescence spectra of  $\beta$ -Lac-Cy5.

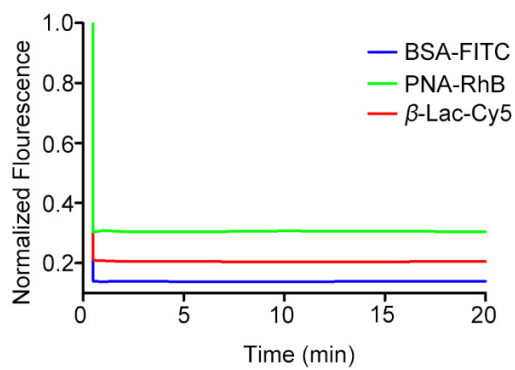

**Figure S12.** Normalized fluorescence intensity of FLPs incubation with AuNPs-PEI for different times.

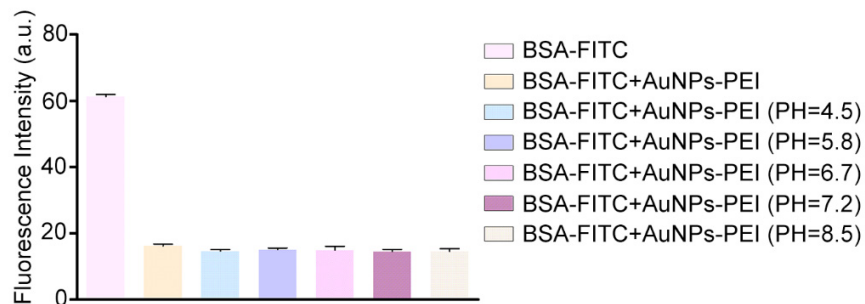

**Figure S13.** Effects of pH (from 4.5 to 8.5) on BSA–FITC and AuNPs–PEI.

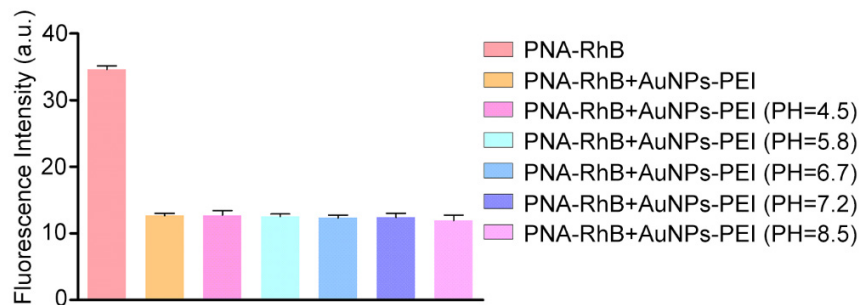

**Figure S14.** Effects of pH (from 4.5 to 8.5) on PNA–RhB and AuNPs–PEI.

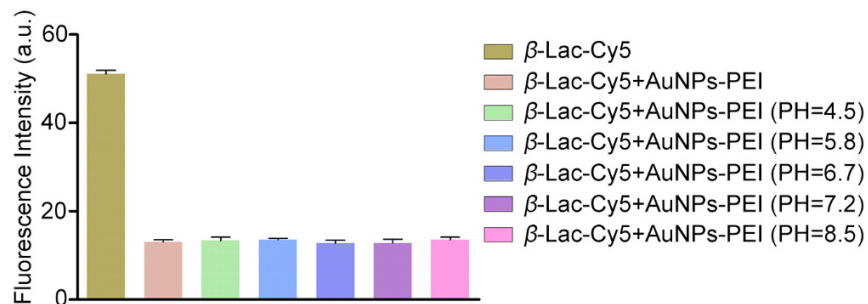

**Figure S15.** Effects of pH (from 4.5 to 8.5) on  $\beta$ -Lac-Cy5 and AuNPs-PEI.

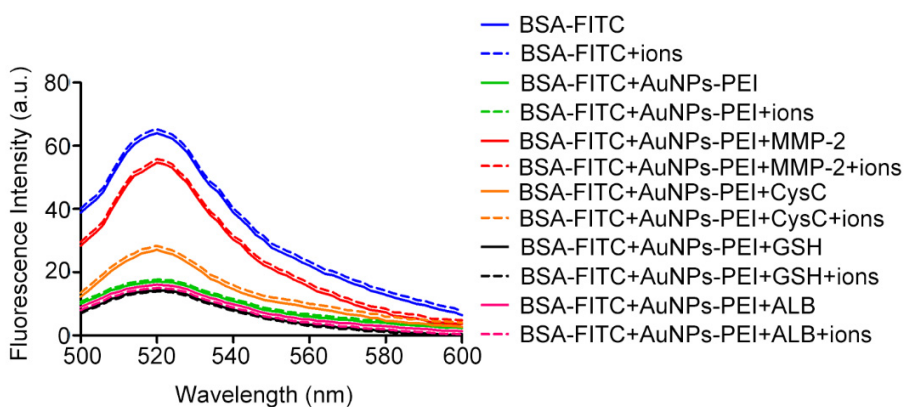

**Figure S16.** Effects of inorganic ions on BSA-FITC and AuNPs-PEI. MMP-2: matrix metalloproteinase-2.

CysC: Cystatin C. GSH: glutathione. ALB: albumin.



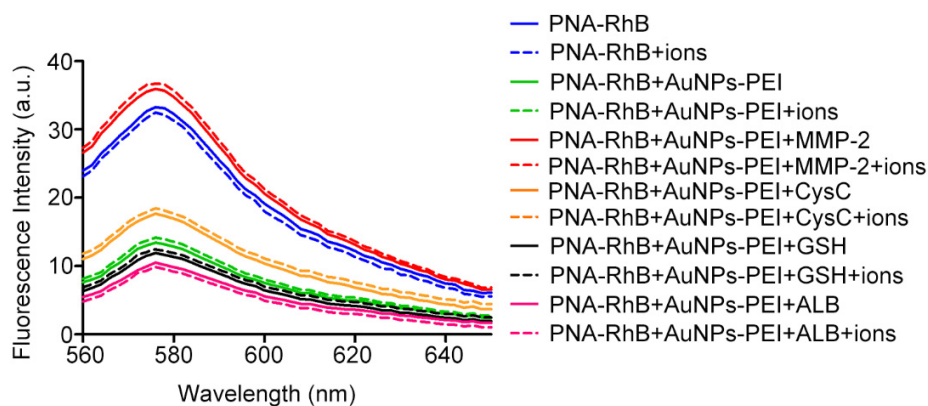

**Figure S17.** Effects of inorganic ions on PNA–RhB and AuNPs–PEI. MMP–2: matrix metalloproteinase–2. CysC: Cystatin C. GSH: glutathione. ALB: albumin.

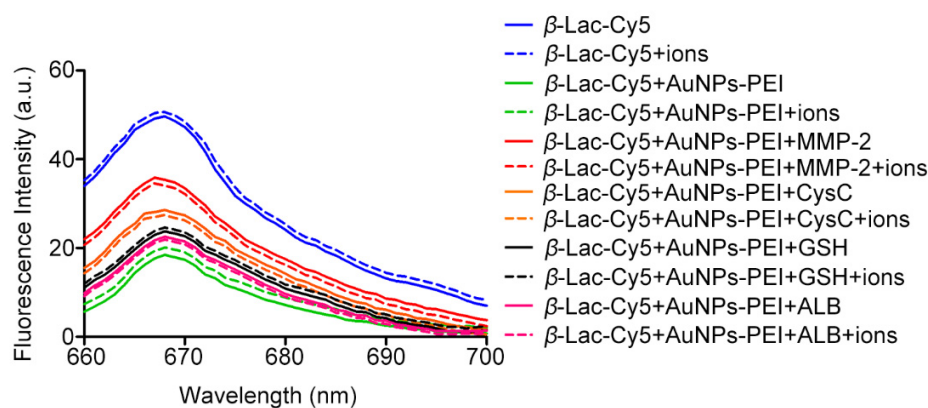

**Figure S18.** Effects of inorganic ions on  $\beta$ –Lac–Cy5 and AuNPs–PEI. MMP–2: matrix metalloproteinase–2. CysC: Cystatin C. GSH: glutathione. ALB: albumin.

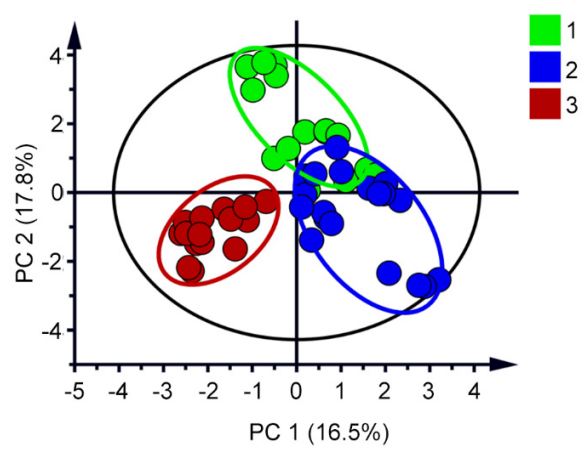

**Figure S19.** Two dimensional PCA score plot for discrimination and evaluation the different types of DIKI.

**Table S1.** Binding parameters for AuNPs–PEI and FLPs as determined by the fitting of the fluorescence titration curves

| Fluorophore      | Binding constant ( $K_a$ ), ( $M^{-1}$ ) | $R^2$ |
|------------------|------------------------------------------|-------|
| BSA–FITC         | $1.41 \times 10^8$                       | 0.999 |
| PNA–RhB          | $2.68 \times 10^6$                       | 0.993 |
| $\beta$ –Lac–Cy5 | $7.43 \times 10^7$                       | 0.998 |

**Table S2. The fluorescence intensity of three FLPs in AGs-induced kidney injury (n=5).**

| Drug name  | Number | BSA-FITC | PNA-RhB | $\beta$ -Lac-Cy5 |
|------------|--------|----------|---------|------------------|
| Gentamicin | 0-1    | 42.29    | 29.36   | 26.65            |
|            | 0-2    | 40.91    | 30.86   | 28.22            |
|            | 0-3    | 43.29    | 29.58   | 30.45            |
|            | 0-4    | 43.92    | 29.52   | 25.24            |
|            | 0-5    | 48.14    | 31.16   | 22.75            |
|            | 0-6    | 40.91    | 32.74   | 32.11            |
|            | 0-7    | 46.42    | 30.00   | 25.45            |
|            | 1-1    | 47.51    | 32.96   | 29.18            |
|            | 1-2    | 47.40    | 32.02   | 32.60            |
|            | 1-3    | 52.54    | 32.64   | 29.68            |
|            | 1-4    | 56.70    | 35.51   | 29.88            |
|            | 1-5    | 51.04    | 33.28   | 30.34            |
|            | 3-1    | 39.53    | 29.30   | 33.44            |
|            | 3-2    | 40.38    | 28.29   | 32.66            |
|            | 3-3    | 44.10    | 29.42   | 32.25            |
|            | 3-4    | 37.81    | 29.13   | 34.89            |
|            | 3-5    | 41.24    | 29.04   | 32.68            |
|            | 3-6    | 47.55    | 28.24   | 32.46            |
|            | 5-1    | 31.62    | 24.18   | 32.57            |
|            | 5-2    | 31.19    | 26.83   | 37.05            |
|            | 5-3    | 27.06    | 26.01   | 34.68            |
|            | 5-4    | 31.50    | 25.96   | 32.34            |
|            | 5-5    | 32.30    | 26.38   | 33.94            |
|            | 7-1    | 33.85    | 26.43   | 41.70            |
|            | 7-2    | 40.59    | 25.57   | 39.71            |
|            | 7-3    | 33.53    | 24.95   | 38.31            |
|            | 7-4    | 32.62    | 24.20   | 41.98            |
|            | 7-5    | 43.32    | 24.51   | 38.53            |
|            | 7-6    | 43.91    | 29.12   | 39.61            |
|            | 9-1    | 46.55    | 25.42   | 36.57            |
|            | 9-2    | 43.85    | 23.60   | 36.28            |
|            | 9-3    | 45.28    | 25.14   | 36.92            |
|            | 9-4    | 45.23    | 24.72   | 36.59            |
|            | 14-1   | 53.80    | 33.78   | 36.42            |
|            | 14-2   | 58.52    | 33.47   | 38.50            |
|            | 14-3   | 56.16    | 33.63   | 37.46            |
|            | 14-4   | 55.16    | 33.46   | 36.23            |
|            | 0-1    | 42.29    | 29.36   | 26.65            |
|            | 0-2    | 40.91    | 30.86   | 28.22            |
|            | 0-3    | 43.29    | 29.58   | 30.45            |
|            | 0-4    | 43.92    | 29.52   | 25.24            |
|            | 0-5    | 48.14    | 31.16   | 22.75            |
|            | 0-6    | 40.91    | 32.74   | 32.11            |
|            | 0-7    | 46.42    | 30.00   | 25.45            |
|            | 1-1    | 48.48    | 28.60   | 34.31            |
|            | 1-2    | 44.33    | 31.68   | 34.50            |

|            |      |       |       |       |
|------------|------|-------|-------|-------|
| Neomycin   | 1-3  | 43.29 | 32.07 | 37.08 |
|            | 1-4  | 43.49 | 31.15 | 37.99 |
|            | 3-1  | 32.59 | 21.93 | 32.38 |
|            | 3-2  | 43.33 | 21.80 | 34.87 |
|            | 3-3  | 37.57 | 21.86 | 35.16 |
|            | 3-4  | 31.91 | 23.10 | 33.78 |
|            | 3-5  | 33.72 | 23.02 | 36.68 |
|            | 5-1  | 31.49 | 25.84 | 26.20 |
|            | 5-2  | 32.50 | 26.22 | 23.33 |
|            | 5-3  | 36.61 | 25.09 | 24.45 |
|            | 5-4  | 36.88 | 25.50 | 21.17 |
|            | 5-5  | 39.03 | 27.26 | 22.73 |
|            | 7-1  | 41.48 | 26.71 | 27.20 |
|            | 7-2  | 41.09 | 27.06 | 26.70 |
|            | 7-3  | 40.02 | 28.52 | 27.20 |
|            | 7-4  | 39.19 | 26.59 | 28.47 |
|            | 7-5  | 37.41 | 27.03 | 26.43 |
|            | 9-1  | 27.64 | 29.48 | 24.90 |
|            | 9-2  | 27.94 | 28.60 | 25.72 |
|            | 9-3  | 26.02 | 27.55 | 26.48 |
|            | 9-4  | 27.73 | 25.76 | 27.59 |
|            | 9-5  | 27.33 | 27.85 | 26.17 |
|            | 14-1 | 42.58 | 27.54 | 40.09 |
|            | 14-2 | 42.80 | 26.72 | 38.90 |
|            | 14-3 | 42.58 | 27.23 | 39.50 |
| Tobramycin | 0-1  | 42.29 | 29.36 | 26.65 |
|            | 0-2  | 42.19 | 25.79 | 26.22 |
|            | 0-3  | 30.63 | 30.00 | 20.84 |
|            | 0-4  | 40.91 | 30.86 | 28.22 |
|            | 0-5  | 43.29 | 29.58 | 30.45 |
|            | 0-6  | 43.92 | 29.52 | 25.24 |
|            | 0-7  | 46.42 | 30.00 | 25.45 |
|            | 0-8  | 36.70 | 25.95 | 29.56 |
|            | 1-1  | 54.30 | 32.36 | 40.79 |
|            | 1-2  | 55.54 | 29.41 | 37.88 |
|            | 1-3  | 55.38 | 33.22 | 40.72 |
|            | 1-4  | 55.18 | 31.24 | 37.42 |
|            | 1-5  | 53.68 | 30.89 | 40.17 |
|            | 3-1  | 36.42 | 33.11 | 41.33 |
|            | 3-2  | 36.35 | 30.10 | 38.27 |
|            | 3-3  | 36.97 | 29.13 | 38.78 |
|            | 3-4  | 39.16 | 30.49 | 41.41 |
|            | 3-5  | 34.32 | 32.33 | 41.23 |
|            | 5-1  | 37.56 | 28.48 | 33.79 |
|            | 5-2  | 33.42 | 27.70 | 34.46 |
|            | 5-3  | 36.88 | 27.09 | 36.30 |
|            | 5-4  | 38.01 | 26.75 | 34.32 |
|            | 5-6  | 37.62 | 28.18 | 34.34 |
|            | 7-1  | 38.59 | 33.23 | 35.99 |

---

|      |       |       |       |
|------|-------|-------|-------|
| 7-2  | 37.46 | 35.36 | 38.20 |
| 7-3  | 35.75 | 32.50 | 33.68 |
| 7-4  | 37.28 | 33.16 | 32.58 |
| 7-5  | 37.43 | 31.81 | 35.38 |
| 9-1  | 48.37 | 33.05 | 43.09 |
| 9-2  | 50.79 | 31.76 | 44.89 |
| 9-3  | 45.28 | 33.02 | 45.03 |
| 9-4  | 51.48 | 34.14 | 43.61 |
| 9-5  | 40.82 | 34.70 | 40.33 |
| 14-1 | 32.72 | 24.22 | 38.23 |
| 14-2 | 31.65 | 25.06 | 37.12 |
| 14-3 | 32.19 | 24.64 | 37.67 |
| 14-4 | 30.90 | 24.67 | 38.09 |

---

**Table S3. The fluorescence intensity of three FLPs in PPIs-induced kidney injury (n=5).**

| Drug name  | Number | BSA-FITC | PNA-RhB | $\beta$ -Lac-Cy5 |
|------------|--------|----------|---------|------------------|
| Omeprazole | 0-1    | 42.29    | 29.36   | 26.65            |
|            | 0-2    | 40.91    | 30.86   | 28.22            |
|            | 0-3    | 43.29    | 29.58   | 30.45            |
|            | 0-4    | 43.92    | 29.52   | 25.24            |
|            | 0-5    | 48.14    | 31.16   | 22.75            |
|            | 0-6    | 40.91    | 32.74   | 32.11            |
|            | 0-7    | 46.42    | 30.00   | 25.45            |
|            | 1-1    | 64.74    | 29.20   | 35.34            |
|            | 1-2    | 65.64    | 28.56   | 36.62            |
|            | 1-3    | 66.39    | 29.12   | 39.08            |
|            | 1-4    | 66.89    | 29.03   | 39.88            |
|            | 3-1    | 39.13    | 26.29   | 35.89            |
|            | 3-2    | 44.87    | 26.01   | 44.96            |
|            | 3-3    | 44.43    | 26.21   | 41.39            |
|            | 5-1    | 39.64    | 26.75   | 42.98            |
|            | 5-2    | 40.69    | 25.89   | 37.58            |
|            | 5-3    | 44.31    | 26.42   | 41.36            |
|            | 5-4    | 43.33    | 26.16   | 38.84            |
|            | 5-5    | 42.99    | 26.02   | 42.67            |
|            | 7-1    | 31.28    | 29.24   | 30.15            |
|            | 7-2    | 30.41    | 29.64   | 32.68            |
|            | 7-3    | 29.15    | 30.04   | 31.48            |
|            | 7-4    | 31.01    | 28.54   | 31.93            |
|            | 7-5    | 42.19    | 25.79   | 26.22            |
|            | 7-6    | 36.70    | 25.95   | 29.56            |
|            | 9-1    | 51.09    | 29.86   | 40.60            |
|            | 9-2    | 54.07    | 26.01   | 40.75            |
|            | 9-3    | 56.72    | 28.58   | 40.98            |
|            | 9-4    | 55.19    | 27.50   | 39.54            |
|            | 14-1   | 48.93    | 30.29   | 40.10            |
|            | 14-2   | 48.21    | 32.71   | 38.94            |
|            | 14-3   | 49.10    | 31.70   | 39.41            |
|            | 14-4   | 56.28    | 31.70   | 32.86            |
|            | 0-1    | 42.29    | 29.36   | 26.65            |
|            | 0-2    | 48.48    | 28.60   | 34.31            |
|            | 0-3    | 40.91    | 30.86   | 28.22            |
|            | 0-4    | 43.29    | 29.58   | 30.45            |
|            | 0-5    | 43.92    | 29.52   | 25.24            |
|            | 0-6    | 48.14    | 31.16   | 22.75            |
|            | 0-7    | 46.42    | 30.00   | 25.45            |
|            | 1-1    | 39.65    | 32.17   | 35.27            |
|            | 1-2    | 38.72    | 31.43   | 36.83            |
|            | 1-3    | 41.04    | 30.86   | 39.57            |
|            | 1-4    | 46.28    | 28.33   | 36.49            |
|            | 1-5    | 40.05    | 30.17   | 36.72            |
|            | 1-6    | 39.77    | 30.85   | 35.07            |

|              |      |       |       |       |
|--------------|------|-------|-------|-------|
| Lansoprazole | 3-1  | 39.19 | 30.02 | 39.37 |
|              | 3-2  | 39.65 | 31.90 | 40.73 |
|              | 3-3  | 41.27 | 28.57 | 39.28 |
|              | 3-4  | 39.57 | 28.95 | 36.49 |
|              | 3-5  | 38.68 | 31.06 | 37.35 |
|              | 3-6  | 39.98 | 32.02 | 38.71 |
|              | 5-1  | 32.84 | 28.07 | 40.31 |
|              | 5-2  | 36.02 | 28.12 | 42.35 |
|              | 5-3  | 35.36 | 28.79 | 39.75 |
|              | 5-4  | 36.19 | 28.19 | 42.51 |
|              | 5-5  | 36.14 | 28.41 | 40.39 |
|              | 7-1  | 32.14 | 25.76 | 33.60 |
|              | 7-2  | 32.23 | 27.89 | 33.52 |
|              | 7-3  | 33.88 | 27.56 | 39.44 |
|              | 7-4  | 33.98 | 26.55 | 38.38 |
|              | 9-1  | 36.89 | 29.16 | 39.00 |
|              | 9-2  | 36.19 | 29.58 | 40.11 |
|              | 9-3  | 36.12 | 29.09 | 38.48 |
|              | 9-4  | 36.51 | 29.31 | 38.63 |
|              | 14-1 | 46.81 | 32.95 | 35.66 |
|              | 14-2 | 47.67 | 31.59 | 33.52 |
|              | 14-3 | 46.99 | 32.56 | 34.88 |
|              | 14-4 | 40.91 | 32.74 | 32.11 |
| Pantoprazole | 0-1  | 43.84 | 31.07 | 27.51 |
|              | 0-2  | 42.10 | 32.42 | 27.88 |
|              | 0-3  | 43.49 | 31.25 | 29.92 |
|              | 0-4  | 43.61 | 30.49 | 23.88 |
|              | 0-5  | 50.15 | 32.62 | 24.43 |
|              | 0-6  | 46.99 | 31.39 | 27.30 |
|              | 1-1  | 58.56 | 30.03 | 32.67 |
|              | 1-2  | 56.06 | 31.76 | 32.01 |
|              | 1-3  | 60.57 | 32.36 | 32.22 |
|              | 1-4  | 53.99 | 34.34 | 30.48 |
|              | 1-5  | 57.59 | 32.95 | 35.28 |
|              | 3-1  | 46.20 | 28.14 | 30.41 |
|              | 3-2  | 47.79 | 27.73 | 31.18 |
|              | 3-3  | 47.49 | 28.16 | 33.54 |
|              | 3-4  | 47.86 | 27.85 | 33.17 |
|              | 3-5  | 45.06 | 28.54 | 30.07 |
|              | 5-1  | 54.78 | 29.13 | 35.42 |
|              | 5-2  | 54.47 | 30.27 | 32.05 |
|              | 5-3  | 41.39 | 32.03 | 35.60 |
|              | 5-4  | 54.50 | 29.42 | 34.74 |
|              | 5-5  | 41.60 | 33.16 | 32.58 |
|              | 7-1  | 39.91 | 31.99 | 36.97 |
|              | 7-2  | 39.75 | 28.92 | 36.01 |
|              | 7-3  | 38.62 | 31.24 | 36.23 |
|              | 7-4  | 38.26 | 31.38 | 37.28 |
|              | 9-1  | 38.54 | 27.66 | 32.94 |



|              |      |       |       |       |
|--------------|------|-------|-------|-------|
|              | 9-2  | 37.94 | 28.97 | 30.79 |
|              | 9-3  | 37.48 | 29.85 | 29.22 |
|              | 9-4  | 42.34 | 26.69 | 27.98 |
|              | 9-5  | 37.07 | 28.01 | 30.11 |
|              | 14-1 | 30.00 | 23.60 | 33.95 |
|              | 14-2 | 30.47 | 24.46 | 31.06 |
|              | 14-3 | 30.14 | 25.53 | 32.09 |
|              | 14-4 | 23.46 | 27.55 | 31.07 |
| Esomeprazole | 0-1  | 41.59 | 30.62 | 24.25 |
|              | 0-2  | 40.00 | 29.09 | 30.90 |
|              | 0-3  | 43.82 | 30.04 | 29.70 |
|              | 0-4  | 44.07 | 31.11 | 28.23 |
|              | 0-5  | 46.32 | 29.41 | 22.40 |
|              | 0-6  | 40.24 | 31.72 | 30.92 |
|              | 0-7  | 48.06 | 30.07 | 24.48 |
|              | 1-1  | 55.50 | 35.13 | 34.14 |
|              | 1-2  | 56.00 | 30.04 | 32.20 |
|              | 1-3  | 59.16 | 35.05 | 34.82 |
|              | 1-4  | 57.58 | 32.11 | 31.60 |
|              | 1-5  | 60.28 | 34.99 | 33.19 |
|              | 1-6  | 60.78 | 34.31 | 34.37 |
|              | 3-1  | 65.15 | 32.41 | 37.14 |
|              | 3-2  | 47.05 | 33.80 | 38.75 |
|              | 3-3  | 60.97 | 34.08 | 29.92 |
|              | 3-4  | 62.24 | 34.06 | 32.79 |
|              | 3-5  | 48.56 | 33.91 | 39.47 |
|              | 5-1  | 53.24 | 27.40 | 41.44 |
|              | 5-2  | 55.94 | 25.02 | 41.63 |
|              | 5-3  | 55.02 | 27.82 | 41.32 |
|              | 5-4  | 55.05 | 25.16 | 41.89 |
|              | 5-5  | 44.79 | 26.99 | 42.35 |
|              | 7-1  | 35.35 | 33.80 | 42.47 |
|              | 7-2  | 50.42 | 31.08 | 34.89 |
|              | 7-3  | 48.47 | 30.04 | 36.99 |
|              | 7-4  | 55.63 | 30.25 | 32.19 |
|              | 7-5  | 51.02 | 33.48 | 26.01 |
|              | 9-1  | 62.64 | 30.32 | 45.55 |
|              | 9-2  | 70.78 | 33.88 | 43.28 |
|              | 9-3  | 74.04 | 28.39 | 48.42 |
|              | 9-4  | 72.38 | 29.37 | 47.47 |
|              | 14-1 | 42.78 | 25.67 | 26.67 |
|              | 14-2 | 36.86 | 25.33 | 31.74 |
|              | 14-3 | 30.99 | 27.26 | 34.86 |

**Table S4. The fluorescence intensity of three FLPs in NSAIDs-induced kidney injury (n=5).**

| Drug name | Number | BSA-FITC | PNA-RhB | $\beta$ -Lac-Cy5 |
|-----------|--------|----------|---------|------------------|
| Ibuprofen | 0-1    | 42.29    | 29.36   | 26.65            |
|           | 0-2    | 40.91    | 30.86   | 28.22            |
|           | 0-3    | 43.29    | 29.58   | 30.45            |
|           | 0-4    | 43.92    | 29.52   | 25.24            |
|           | 0-5    | 40.91    | 32.74   | 32.11            |
|           | 0-6    | 46.42    | 30.00   | 25.45            |
|           | 1-1    | 53.34    | 28.19   | 37.25            |
|           | 1-2    | 56.44    | 27.63   | 36.17            |
|           | 1-3    | 55.51    | 29.07   | 40.00            |
|           | 1-4    | 54.53    | 28.63   | 38.22            |
|           | 1-5    | 52.70    | 28.35   | 36.90            |
|           | 1-6    | 54.50    | 28.37   | 37.71            |
|           | 3-1    | 31.17    | 27.40   | 36.27            |
|           | 3-2    | 28.07    | 30.48   | 33.33            |
|           | 3-3    | 36.97    | 25.77   | 33.80            |
|           | 3-4    | 34.58    | 26.97   | 37.73            |
|           | 3-5    | 35.79    | 28.71   | 37.57            |
|           | 3-6    | 29.12    | 26.25   | 38.29            |
|           | 5-1    | 44.61    | 28.12   | 34.85            |
|           | 5-2    | 38.09    | 26.17   | 32.95            |
|           | 5-3    | 40.80    | 28.18   | 32.71            |
|           | 5-4    | 35.11    | 27.95   | 34.01            |
|           | 5-5    | 40.67    | 27.69   | 33.06            |
|           | 7-1    | 53.18    | 32.77   | 40.75            |
|           | 7-2    | 52.22    | 33.78   | 42.22            |
|           | 7-3    | 56.31    | 32.43   | 43.47            |
|           | 7-4    | 54.07    | 33.97   | 40.61            |
|           | 7-5    | 57.10    | 34.10   | 40.25            |
|           | 7-6    | 54.58    | 33.41   | 41.46            |
|           | 9-1    | 36.51    | 23.11   | 36.04            |
|           | 9-2    | 33.52    | 20.86   | 32.79            |
|           | 9-3    | 28.90    | 22.38   | 34.16            |
|           | 9-4    | 29.19    | 24.20   | 34.31            |
|           | 9-5    | 32.03    | 22.64   | 34.33            |
|           | 14-1   | 33.77    | 26.33   | 29.81            |
|           | 14-2   | 31.24    | 24.39   | 28.97            |
|           | 14-3   | 30.48    | 29.59   | 29.25            |
|           | 14-4   | 31.83    | 26.77   | 29.34            |
|           | 0-1    | 42.29    | 29.36   | 26.65            |
|           | 0-2    | 40.91    | 30.86   | 28.22            |
|           | 0-3    | 43.92    | 29.52   | 25.24            |
|           | 0-4    | 48.14    | 31.16   | 22.75            |
|           | 0-5    | 56.28    | 31.70   | 32.86            |
|           | 0-6    | 46.42    | 30.00   | 25.45            |
|           | 1-1    | 43.64    | 26.27   | 31.07            |
|           | 1-2    | 42.47    | 29.57   | 32.36            |

|            |      |       |       |       |
|------------|------|-------|-------|-------|
| Naproxen   | 1-3  | 38.41 | 29.81 | 31.34 |
|            | 1-4  | 42.22 | 29.74 | 30.51 |
|            | 1-5  | 38.56 | 26.12 | 36.43 |
|            | 1-6  | 40.09 | 27.40 | 34.67 |
|            | 3-1  | 32.70 | 26.27 | 32.26 |
|            | 3-3  | 31.46 | 25.18 | 30.13 |
|            | 3-4  | 29.44 | 22.81 | 32.42 |
|            | 3-5  | 32.89 | 26.12 | 33.37 |
|            | 3-6  | 39.71 | 24.89 | 31.94 |
|            | 5-1  | 46.94 | 32.69 | 44.44 |
|            | 5-2  | 49.29 | 31.36 | 43.82 |
|            | 5-3  | 40.65 | 34.41 | 39.99 |
|            | 5-4  | 40.20 | 33.91 | 38.04 |
|            | 7-1  | 51.86 | 31.63 | 40.12 |
|            | 7-2  | 52.12 | 33.30 | 42.36 |
|            | 7-3  | 41.26 | 32.09 | 44.94 |
|            | 7-4  | 39.99 | 31.05 | 41.19 |
|            | 7-5  | 52.56 | 27.40 | 40.07 |
|            | 9-1  | 56.67 | 32.95 | 39.21 |
|            | 9-2  | 57.52 | 32.46 | 39.32 |
|            | 9-4  | 50.49 | 35.05 | 35.40 |
|            | 9-5  | 58.17 | 30.21 | 35.14 |
|            | 9-6  | 56.28 | 31.70 | 32.86 |
|            | 14-1 | 66.26 | 34.87 | 49.57 |
|            | 14-2 | 67.43 | 35.48 | 48.51 |
|            | 14-3 | 66.84 | 35.18 | 49.04 |
|            | 14-4 | 65.54 | 34.87 | 48.65 |
| Diclofenac | 0-1  | 42.29 | 29.36 | 26.65 |
|            | 0-2  | 40.91 | 30.86 | 28.22 |
|            | 0-3  | 43.29 | 29.58 | 30.45 |
|            | 0-4  | 43.92 | 29.52 | 25.24 |
|            | 0-5  | 48.14 | 31.16 | 22.75 |
|            | 0-6  | 40.91 | 32.74 | 32.11 |
|            | 0-7  | 46.42 | 30.00 | 25.45 |
|            | 1-1  | 51.92 | 30.31 | 32.91 |
|            | 1-2  | 48.85 | 31.42 | 32.24 |
|            | 1-3  | 47.99 | 29.97 | 34.39 |
|            | 1-4  | 48.66 | 33.17 | 39.99 |
|            | 1-5  | 48.53 | 32.12 | 32.75 |
|            | 1-6  | 51.55 | 32.98 | 35.64 |
|            | 3-1  | 35.59 | 31.53 | 38.60 |
|            | 3-2  | 37.06 | 29.35 | 35.57 |
|            | 3-3  | 37.19 | 26.68 | 30.76 |
|            | 3-4  | 37.20 | 28.31 | 37.76 |
|            | 3-5  | 37.49 | 26.45 | 37.48 |
|            | 3-6  | 30.01 | 29.92 | 33.75 |
|            | 5-1  | 40.97 | 29.75 | 39.68 |
|            | 5-2  | 40.31 | 25.61 | 37.10 |
|            | 5-3  | 43.45 | 27.92 | 36.32 |

|      |       |       |       |
|------|-------|-------|-------|
| 5-4  | 41.58 | 27.76 | 37.70 |
| 7-1  | 54.40 | 29.96 | 39.03 |
| 7-2  | 55.93 | 28.60 | 37.35 |
| 7-3  | 53.50 | 28.74 | 35.15 |
| 7-4  | 55.98 | 26.34 | 36.28 |
| 7-5  | 54.95 | 28.41 | 36.95 |
| 9-1  | 32.18 | 23.63 | 36.13 |
| 9-2  | 33.07 | 23.09 | 37.93 |
| 9-3  | 31.70 | 25.01 | 35.07 |
| 9-4  | 32.86 | 26.28 | 33.29 |
| 9-5  | 31.55 | 24.95 | 33.30 |
| 14-1 | 42.19 | 25.79 | 26.22 |
| 14-2 | 36.41 | 27.90 | 23.53 |

**Table S5.** The VIP value of identification the three types of DIKI (3, 5, and 7 represent days of administration)

| Var ID (primary)   | VIP     |
|--------------------|---------|
| BSA-FITC-7         | 1.69164 |
| BSA-FITC-3         | 1.40387 |
| $\beta$ -Lac-Cy5-5 | 1.38330 |
| BSA-FITC-5         | 1.31458 |
| $\beta$ -Lac-Cy5-7 | 1.19527 |
| PNA-RhB-5          | 1.05385 |

**Table S6.** The training matrix of fluorescence response patterns of AuNPs–PEI/FLPs sensor against the three DIKI types (n=5).

|     | Drug name    | BSA–FITC–3 | BSA–FITC–5 | PNA–RhB–5 | $\beta$ –Lac–Cy5–5 | BSA–FITC–7 | $\beta$ –Lac–Cy5–7 |
|-----|--------------|------------|------------|-----------|--------------------|------------|--------------------|
| AGs | gentamicin   | 39.5263    | 31.6187    | 24.1776   | 32.5692            | 33.8467    | 41.6963            |
|     | gentamicin   | 40.3848    | 31.1930    | 26.8298   | 37.0489            | 40.5949    | 39.7112            |
|     | gentamicin   | 44.0951    | 27.0634    | 26.0146   | 34.6765            | 33.5250    | 38.3102            |
|     | gentamicin   | 37.8056    | 31.5034    | 25.9602   | 32.3440            | 32.6238    | 41.9842            |
|     | gentamicin   | 41.2400    | 32.2958    | 26.3772   | 33.9402            | 43.3223    | 38.5322            |
|     | neomycin     | 32.5895    | 31.4898    | 25.8412   | 26.2019            | 41.4822    | 27.2006            |
|     | neomycin     | 43.3313    | 32.5004    | 26.2237   | 23.3322            | 41.0896    | 26.6977            |
|     | neomycin     | 37.5684    | 36.6060    | 25.0939   | 24.4511            | 40.0216    | 27.2038            |
|     | neomycin     | 31.9121    | 36.8767    | 25.4975   | 21.1692            | 39.1893    | 28.4742            |
|     | neomycin     | 33.7216    | 39.0335    | 27.2585   | 22.7269            | 37.4109    | 26.4321            |
|     | tobramycin   | 36.4247    | 37.5641    | 28.4767   | 33.7944            | 38.5918    | 35.9887            |
|     | tobramycin   | 36.3533    | 33.4189    | 27.6971   | 34.4623            | 37.4603    | 38.1951            |
|     | tobramycin   | 36.9739    | 36.8751    | 27.0912   | 36.3011            | 35.7462    | 33.6776            |
|     | tobramycin   | 39.1583    | 38.0051    | 26.7530   | 34.3198            | 37.2785    | 32.5803            |
|     | tobramycin   | 34.3228    | 27.4164    | 26.2679   | 32.7086            | 37.4347    | 35.3796            |
| PPI | lansoprazole | 39.1910    | 32.8406    | 28.0713   | 40.3098            | 32.1355    | 33.6008            |
|     | lansoprazole | 39.6498    | 36.0188    | 28.1210   | 42.3468            | 32.2332    | 33.5196            |
|     | lansoprazole | 41.2653    | 35.3564    | 28.7898   | 39.7543            | 33.8825    | 39.4444            |
|     | lansoprazole | 39.5669    | 36.1873    | 28.1882   | 42.5129            | 33.9782    | 38.3842            |
|     | lansoprazole | 38.6760    | 36.1410    | 28.4111   | 40.3927            | 33.0574    | 36.2372            |
|     | omeprazole   | 39.1264    | 39.6441    | 26.7452   | 42.9824            | 31.2804    | 30.1527            |
|     | omeprazole   | 44.8651    | 40.6936    | 25.8868   | 37.5834            | 30.4091    | 32.6794            |
|     | omeprazole   | 44.4332    | 44.3137    | 26.4208   | 41.3609            | 29.1521    | 31.4768            |
|     | omeprazole   | 42.8082    | 43.3292    | 26.1566   | 38.8355            | 31.0107    | 31.9294            |
|     | omeprazole   | 39.8082    | 42.9908    | 26.0182   | 42.6722            | 42.1922    | 26.2244            |
|     | pantoprazole | 46.1981    | 54.7838    | 29.1327   | 35.4156            | 39.9085    | 36.9717            |
|     | pantoprazole | 47.7899    | 54.4737    | 30.2712   | 32.0455            | 39.7527    | 36.0066            |
|     | pantoprazole | 47.4948    | 41.3863    | 32.0340   | 35.5978            | 38.6191    | 36.2348            |
|     | pantoprazole | 47.8569    | 54.5047    | 29.4215   | 34.7418            | 38.2612    | 37.2846            |
|     | pantoprazole | 45.0612    | 41.5985    | 33.1601   | 32.5803            | 39.1354    | 36.6244            |
|     | esomeprazole | 65.1510    | 53.2432    | 27.4044   | 41.4411            | 35.3490    | 42.4687            |
|     | esomeprazole | 47.0544    | 55.9409    | 25.0216   | 41.6348            | 50.4232    | 34.8945            |
|     | esomeprazole | 60.9746    | 55.0226    | 27.8176   | 41.3190            | 48.4688    | 36.9880            |
| PPI | esomeprazole | 62.2440    | 55.0524    | 25.1606   | 41.8928            | 55.6276    | 32.1850            |
|     | naproxen     | 32.6953    | 46.9447    | 32.6882   | 44.4375            | 51.8637    | 40.1226            |
|     | naproxen     | 31.4638    | 49.2903    | 31.3601   | 43.8162            | 52.1218    | 42.3574            |
|     | naproxen     | 29.4381    | 40.6523    | 34.4090   | 39.9886            | 41.2596    | 44.9445            |
|     | naproxen     | 32.8870    | 40.1969    | 33.9068   | 38.0396            | 39.9851    | 41.1872            |
|     | naproxen     | 39.7063    | 44.2710    | 33.0910   | 41.5705            | 52.5645    | 40.0741            |
|     | Ibuprofen    | 31.1749    | 44.6094    | 28.1189   | 34.8500            | 53.1838    | 40.7460            |
|     | Ibuprofen    | 28.0718    | 38.0893    | 26.1736   | 32.9494            | 52.2150    | 42.2240            |

|        |            |         |         |         |         |         |         |
|--------|------------|---------|---------|---------|---------|---------|---------|
| NASIDs | Ibuprofen  | 36.9724 | 40.8008 | 28.1771 | 32.7083 | 56.3140 | 43.4661 |
|        | Ibuprofen  | 34.5800 | 35.1149 | 27.9475 | 34.0148 | 54.0692 | 40.6065 |
|        | Ibuprofen  | 35.7916 | 40.6696 | 27.6902 | 33.0587 | 57.0970 | 40.2516 |
|        | diclofenac | 35.5897 | 40.9747 | 29.7475 | 39.6789 | 54.3971 | 39.0340 |
|        | diclofenac | 37.0628 | 40.3067 | 25.6118 | 37.0969 | 55.9325 | 37.3509 |
|        | diclofenac | 37.1851 | 43.4543 | 27.9226 | 36.3202 | 53.5008 | 35.1542 |
|        | diclofenac | 37.2039 | 41.5786 | 27.7606 | 37.6986 | 55.9763 | 36.2794 |
|        | diclofenac | 37.4930 | 40.7832 | 27.0342 | 36.6512 | 54.9517 | 36.9546 |

---
